# Supplementary material
Source: Springer Nature journal article supplement (https://www.springermedizin.de/resource/supplementary/12875_2014_1089_MOESM5_ESM.docx/9435806)
Supplement: MOESM5 [file 9435806]

| **Table 4.** The five most common reasons for encounter according to ICPC-2 classification for each contact type1 | | | | | | | | | | | | | | |
| --- | --- | --- | --- | --- | --- | --- | --- | --- | --- | --- | --- | --- | --- | --- |
|  | | | **Reasons for encounter (n (%))** | | | | | | | | |  | | |
|  | **Telephone consultation2**  (n=3,133) | | | | **Telephone referral3**  (n=2,177) | | | **Clinical consultation4**  (n=4,052) | | | **Home visit5**  (n=5,867) | | | |
| **Heart** | Non-specific RFEs, general (A69) | 9 | | (11.7) | Shortness of breath/dyspnoea (R02) | 14 | (19.7) | Chest pain (A11) | 5 | (9.8) | Shortness of breath/dyspnoea (R02) | | 48 | (12.8) |
|  | Chest pain (A11) | 7 | | (9.1) | Chest pain (A11) | 4 | (5.6) | Knee symptom (L15) | 4 | (7.8) | Chest pain (A11) | | 31 | (6.8) |
|  | Medication prescription, general (A50) | 3 | | (4.1) | Leg symptom (L14) | 4 | (5.6) | Shortness of breath/dyspnoea (R02) | 3 | (5.9) | Fever (A03) | | 24 | (6.4) |
|  | Arm symptom (L09) | 3 | | (4.1) | Breathing problem (R04) | 3 | (5.6) | Cough (R05) | 3 | (5.9) | Abdominal pain (D01) | | 19 | (4.5) |
|  | Psychological symptoms (P29) | 2 | | (2.1) | Cough (R05) | 3 | (5.6) | Laceration (S18) | 3 | (5.9) | Non-specific RFEs, general (A69) | | 14 | (3.5) |
| **Lung** | Medication prescription, lung (R50) | 17 | | (5.5 ) | Shortness of breath/dyspnoea (R02) | 51 | (18.1) | Cough (R05) | 28 | (8.9) | Shortness of breath/dyspnoea (R02) | | 168 | (14.7) |
|  | Non-specific RFEs, general (A69) | 15 | | (4.3) | Fever (A03) | 25 | (8.5) | Shortness of breath/dyspnoea (R02) | 20 | (6.7) | Fever (A03) | | 105 | (9.9) |
|  | Medication prescription, general (A50) | 11 | | (3.6) | Cough (R05) | 19 | (6.0) | Fever (A03) | 19 | (6.0) | Cough (R05) | | 75 | (6.5) |
|  | Shortness of breath/dyspnoea (R02) | 11 | | (3.6) | Breathing problem (R04) | 17 | (5.7) | Throat symptom (R21) | 15 | (5. 0) | Breathing problem (R04) | | 53 | (4.5) |
|  | Chest pain (A11) | 10 | | (2.7) | Abdominal pain (D01) | 13 | (4.3) | Abdominal pain (D01) | 14 | (3.9) | Death (A96) | | 49 | (4.0) |
| **Diabetes** | Medication prescription, endocrine (T50) | 13 | | (4.6) | Fever (A03) | 22 | (8.1) | Fever (A03) | 13 | (5.4) | Shortness of breath/dyspnoea (R02) | | 90 | (8.6) |
|  | Non-specific RFEs, general (A69) | 13 | | (4.5) | Shortness of breath/dyspnoea (R02) | 15 | (5.6) | Rash localised (S06) | 12 | (5.0) | Fever (A03) | | 60 | (5.6) |
|  | Medication prescription, general (A50) | 12 | | (3.6) | Abdominal pain (D01) | 14 | (5.2) | Throat symptom (R21) | 11 | (4.6) | Death (A96) | | 52 | (5.3) |
|  | Death (A96) | 10 | | (3.0) | Cough (R05) | 9 | (3.6) | Cough (R05) | 10 | (4.2) | Cough (R05) | | 46 | (4.2) |
|  | Leg symptom (L14) | 9 | | (2.6) | Leg symptom (L14) | 9 | (3.3) | Laceration (S18) | 10 | (4.2) | Abdominal pain (D01) | | 42 | (3.9) |
| **Psychiatry** | Psychological symptom (P29) | 12 | | (8.8) | Psych. symptom (P29) | 8 | (11.0) | Fever (A03) | 4 | (7.1) | Psychological symptom (P29) | | 41 | (18.3) |
|  | Medication prescription, psychiatry (P50) | 12 | | (8.2) | Fever (A03) | 4 | (7.0) | Teeth/gum symptom (D19) | 4 | (7.1) | Feeling anxious (P01) | | 13 | (6.7) |
|  | Non-specific, psychological (P69) | 11 | | (7.5) | Depressed (P03) | 3 | (5.3) | Throat symptom (R21) | 4 | (7.1) | Feeling depressed (P03) | | 10 | (4.6) |
|  | Feeling anxious (P01) | 9 | | (7.5) | Abdominal pain (D01) | 3 | (4.1) | Laceration (S18) | 3 | (5.5) | Feeling angry (P04) | | 9 | (4.1) |
|  | Non-specific RFEs, general (A69) | 8 | | (6.1) | Chest pain (A11) | 2 | (4.1) | Abdominal pain localized (D06) | 3 | (5.5) | Chest pain (A11) | | 8 | (3.4) |
| **Cancer** | Death (A96) | 12 | | (3.9) | Fever (A03) | 23 | (8.1) | Throat symptom (R21) | 23 | (8.5) | Death (A96) | | 107 | (11.2) |
|  | Non-specific RFEs, general (A69) | 10 | | (3.5) | Shortness of breath/dyspnoea (R02) | 21 | (7.4) | Fever (A03) | 14 | (5.2) | Fever (A03) | | 82 | (8.2) |
|  | Medication prescription, general (A50) | 9 | | (3.2) | Abdominal pain (D01) | 19 | (6.7) | Cough (R05) | 13 | (4.8) | Abdominal pain (D01) | | 60 | (5.8) |
|  | Abdominal pain (D01) | 8 | | (2.8) | Death (A96) | 17 | (6.3) | Abdominal pain (D01) | 11 | (4.4) | Shortness of breath/dyspnoea (R02) | | 58 | (5.1) |
|  | Fever (A03) | 7 | | (2.1) | Cough (R05) | 9 | (3.5) | Abdominal pain localized(D06) | 11 | (4.3) | Cough (R05) | | 41 | (4.1) |
| **Others** | Abdominal pain (D01) | 76 | | (3.5) | Fever (A03) | 103 | (7.4) | Throat symptom (R21) | 260 | (8.5) | Fever (A03) | | 213 | (7.9) |
|  | Fever (A03) | 65 | | (3.0) | Abdominal pain (D01) | 91 | (6.2) | Fever (A03) | 171 | (5.6) | Abdominal pain (D01) | | 193 | (6.4) |
|  | Medication prescription, general (A50) | 58 | | (2.7) | Throat symptom (R21) | 77 | (5.6) | Cough (R05) | 143 | (4.7) | Death(A96) | | 93 | (3.7) |
|  | Headache (N01) | 57 | | (2.7) | Laceration (S18) | 48 | (3.6) | Abdominal pain (D01) | 121 | (4.0) | Cough (R05) | | 86 | (3.2) |
|  | Non-specific RFEs, general (A69) | 56 | | (2.6) | Cough (R05) | 43 | (3.0) | Laceration (S18) | 97 | (3.7) | Abdominal pain epigastric (D02) | | 85 | (3.1) |
| 1 Number of identified patients for each contact type is calculated without consideration of patients with more than one of the chronic disease. 2 A total of 2,953 unique patients. Referrals to hospitals or other institutions are included in telephone consultations. 4A total of 3,853 unique patients. 5A total of 5,091 unique patients. | | | | | | | | | | | | | | |
